# Supplementary material
Source: Frontiers journal article supplement (https://www.frontiersin.org/articles/460641)

**Supplementary Figure 5.** Forest plots of meta-analysis for change in FSH.

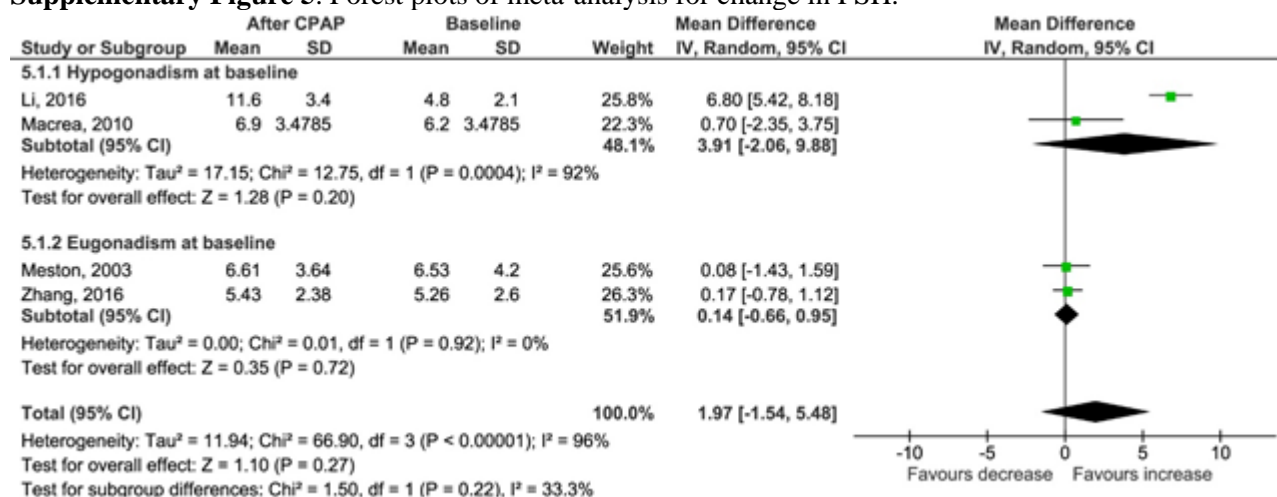

Supplement: Image_5.pdf [file Image_5.pdf]
